# Supplementary material for: Effects of anions on the underpotential deposition behavior of Cu on polycrystalline Pt
Source: Royal Society of Chemistry journal article supplement (doi:10.1039/c8ra00921j), 2018-01-01
Supplement: c8ra00921j1.pdf [file c8ra00921j1.pdf]

## Supplementary Data for

### “Effects of anions on underpotential deposition behavior of Cu at polycrystalline Pt”

Jiao Liu<sup>1,2</sup>, Zhen Xu<sup>2</sup>, Benfeng Zhu<sup>2</sup>, Xiaoqing Du<sup>2</sup>, Yumeng Yang<sup>2</sup>, Chenxi Yi<sup>2</sup>, Zhao Zhang<sup>2,\*</sup>

<sup>1</sup>College of Chemistry and Chemical Engineering, Hunan University, Changsha 410082, PR China

<sup>2</sup>Department of Chemistry, Zhejiang University, Hangzhou 310027, P. R. China

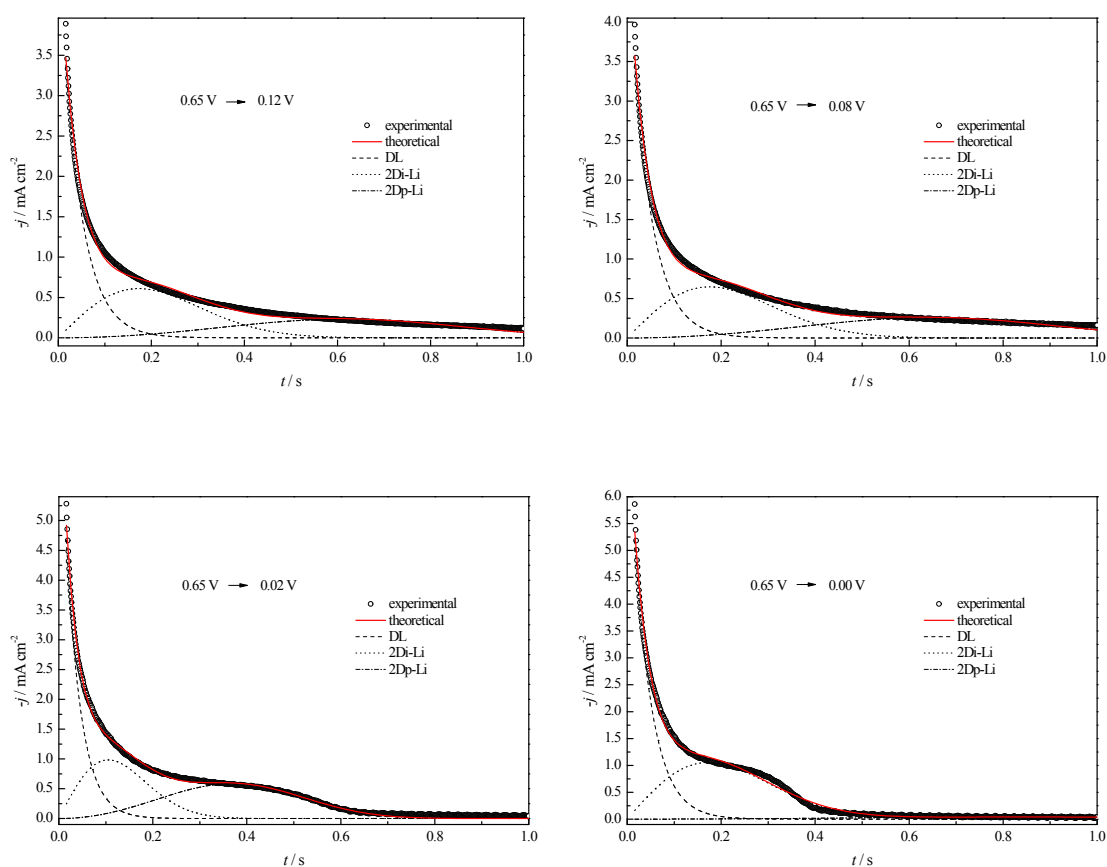

**Fig. S1** Experimental current density transients recorded for Cu up at pc Pt in 5.0 mM CuSO<sub>4</sub>+0.5 M H<sub>2</sub>SO<sub>4</sub>, and theoretical non-linear fitting with Eq. (13) at some selected potentials

\*Corresponding author. Email: [eaglezzy@zju.edu.cn](mailto:eaglezzy@zju.edu.cn); Tel: +86-13305816563.

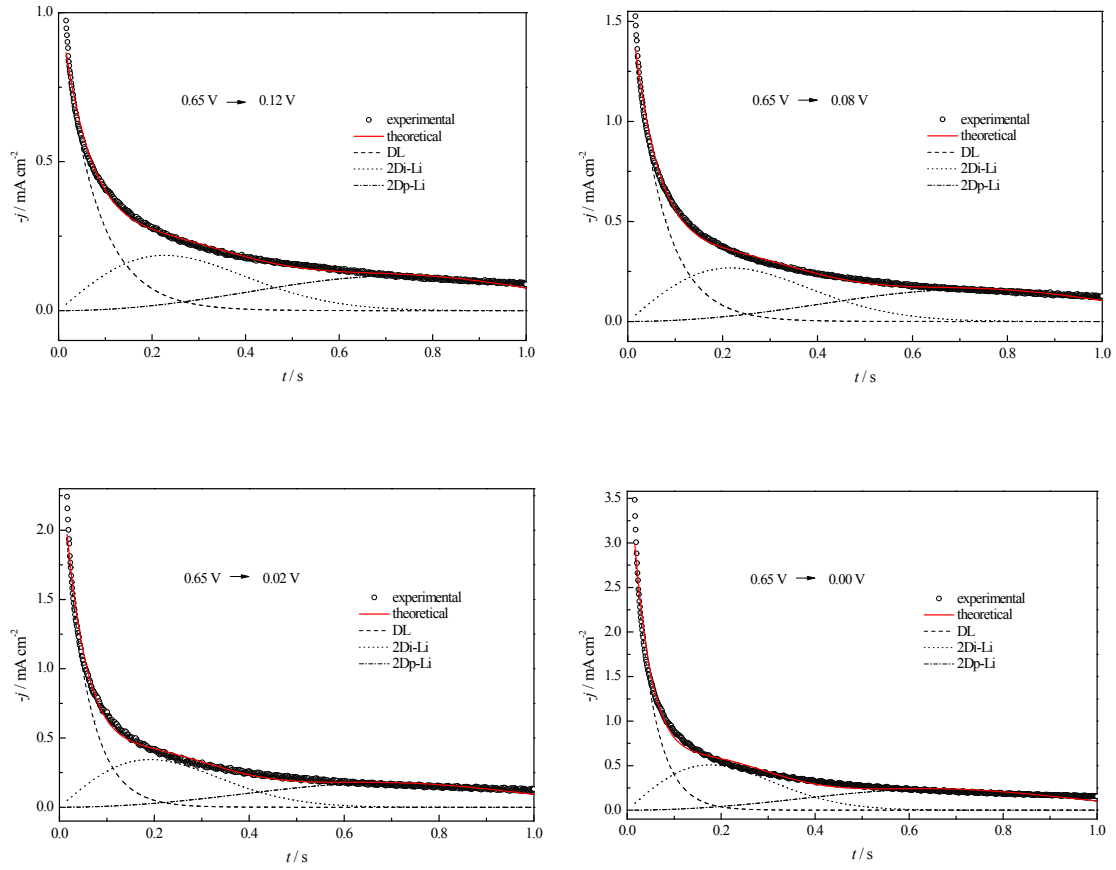

**Fig. S2** Experimental current density transients recorded for Cu up at pc Pt in  $5.0 \text{ mM Cu}(\text{ClO}_4)_2 + 0.5 \text{ M HClO}_4$ , and theoretical non-linear fitting with Eq. (13) at some selected potentials

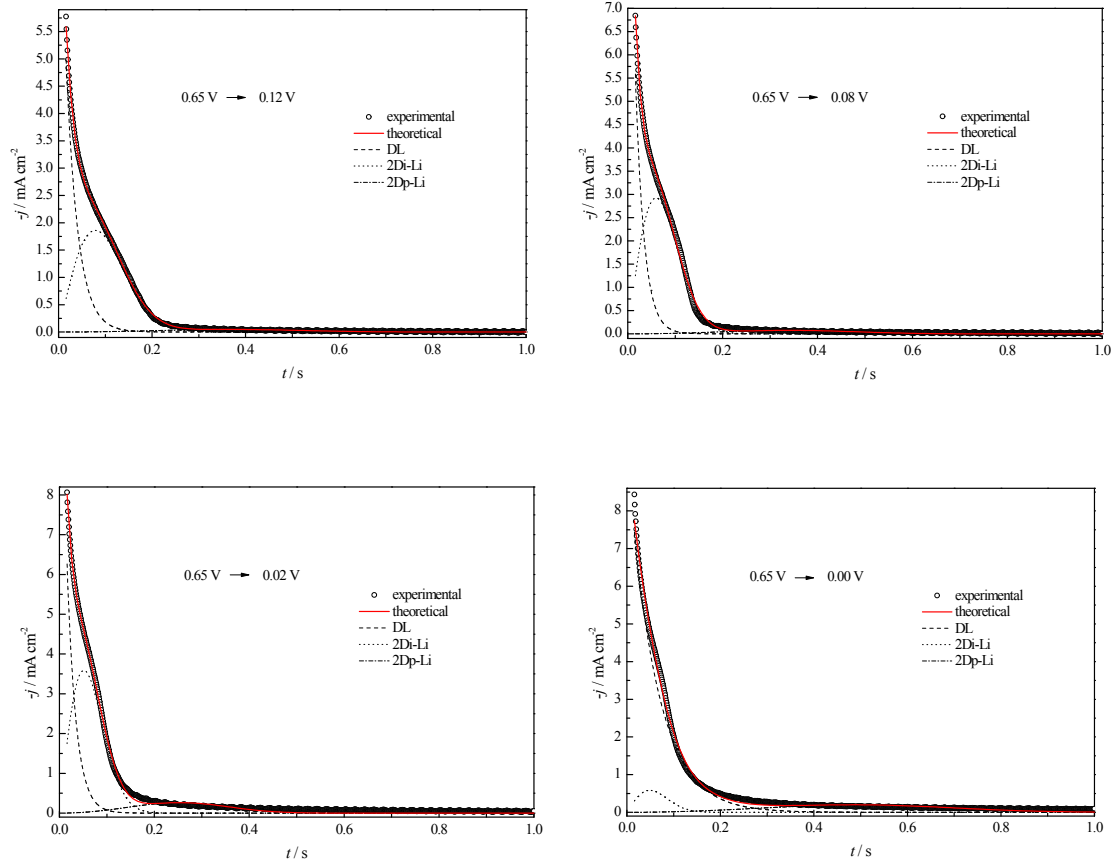

**Fig. S3** Experimental current density transients recorded for Cu upd at pc Pt in 5.0 mM  $\text{Cu}(\text{ClO}_4)_2 + 0.5 \text{ M}$   $\text{HClO}_4 + 1.0 \text{ mM NaCl}$ , and theoretical non-linear fitting with Eq. (13) at some selected potentials

**Table S1** The best fitting results through non-linear fitting with Eq. (13) to the experimental transients for Cu upd at pc Pt in 5.0 mM  $\text{CuSO}_4 + 0.5 \text{ M H}_2\text{SO}_4$  shown in **Fig. 6** and **Fig. S1**

| $E$<br>(V) | $k_1$<br>( $\text{mA cm}^{-2} \text{s}^{-1}$ ) | $k_2$<br>( $\text{s}^{-2}$ ) | $k_3$<br>( $\text{mA cm}^{-2} \text{s}^{-2}$ ) | $k_4$<br>( $\text{s}^{-3}$ ) | $k_5$<br>( $\text{mA cm}^{-2}$ ) | $k_6$<br>( $\text{s}^{-1}$ ) |
|------------|------------------------------------------------|------------------------------|------------------------------------------------|------------------------------|----------------------------------|------------------------------|
| 0.16       | 4.651                                          | 16.749                       | 1.127                                          | 3.032                        | 4.443                            | 23.873                       |
| 0.12       | 5.825                                          | 16.789                       | 1.194                                          | 2.867                        | 4.904                            | 23.263                       |
| 0.08       | 6.087                                          | 16.253                       | 1.204                                          | 2.462                        | 5.023                            | 23.017                       |
| 0.04       | 10.466                                         | 19.824                       | 0.143                                          | 1.791                        | 7.423                            | 23.509                       |
| 0.02       | 15.448                                         | 45.330                       | 8.340                                          | 13.149                       | 7.681                            | 31.052                       |
| 0.00       | 10.040                                         | 16.684                       | 0.109                                          | 1.096                        | 7.777                            | 25.319                       |

**Table S2** The best fitting results through non-linear fitting with Eq. (13) to the experimental transients for Cu upd at pc Pt in 5.0 mM Cu(ClO<sub>4</sub>)<sub>2</sub>+0.5 M HClO<sub>4</sub> shown in **Fig. 6** and **Fig. S2**

| <i>E</i><br>(V) | <i>k</i> <sub>1</sub><br>(mA cm <sup>-2</sup> s <sup>-1</sup> ) | <i>k</i> <sub>2</sub><br>(s <sup>-2</sup> ) | <i>k</i> <sub>3</sub><br>(mA cm <sup>-2</sup> s <sup>-2</sup> ) | <i>k</i> <sub>4</sub><br>(s <sup>-3</sup> ) | <i>k</i> <sub>5</sub><br>(mA cm <sup>-2</sup> ) | <i>k</i> <sub>6</sub><br>(s <sup>-1</sup> ) |
|-----------------|-----------------------------------------------------------------|---------------------------------------------|-----------------------------------------------------------------|---------------------------------------------|-------------------------------------------------|---------------------------------------------|
| 0.16            | 1.527                                                           | 9.684                                       | 0.506                                                           | 1.674                                       | 1.195                                           | 13.127                                      |
| 0.12            | 1.349                                                           | 9.707                                       | 0.430                                                           | 1.730                                       | 1.044                                           | 13.262                                      |
| 0.08            | 2.033                                                           | 10.593                                      | 0.595                                                           | 1.737                                       | 1.697                                           | 15.265                                      |
| 0.04            | 2.426                                                           | 11.749                                      | 0.647                                                           | 1.803                                       | 2.074                                           | 16.937                                      |
| 0.02            | 2.974                                                           | 13.723                                      | 0.723                                                           | 2.046                                       | 2.642                                           | 19.840                                      |
| 0.00            | 4.749                                                           | 16.057                                      | 1.066                                                           | 2.334                                       | 4.255                                           | 23.652                                      |

**Table S3** The best fitting results through non-linear fitting with Eq. (13) to the experimental transients for Cu upd at pc Pt in 5.0 mM Cu(ClO<sub>4</sub>)<sub>2</sub>+0.5 M HClO<sub>4</sub>+1.0 mM NaCl shown in **Fig. 6** and **Fig. S3**

| <i>E</i><br>(V) | <i>k</i> <sub>1</sub><br>(mA cm <sup>-2</sup> s <sup>-1</sup> ) | <i>k</i> <sub>2</sub><br>(s <sup>-2</sup> ) | <i>k</i> <sub>3</sub><br>(mA cm <sup>-2</sup> s <sup>-2</sup> ) | <i>k</i> <sub>4</sub><br>(s <sup>-3</sup> ) | <i>k</i> <sub>5</sub><br>(mA cm <sup>-2</sup> ) | <i>k</i> <sub>6</sub><br>(s <sup>-1</sup> ) |
|-----------------|-----------------------------------------------------------------|---------------------------------------------|-----------------------------------------------------------------|---------------------------------------------|-------------------------------------------------|---------------------------------------------|
| 0.16            | 19.596                                                          | 48.419                                      | 1.017                                                           | 15.231                                      | 7.444                                           | 33.037                                      |
| 0.12            | 39.029                                                          | 81.034                                      | 0.671                                                           | 13.193                                      | 9.331                                           | 39.264                                      |
| 0.08            | 81.049                                                          | 141.329                                     | 1.262                                                           | 16.858                                      | 13.308                                          | 54.245                                      |
| 0.04            | 126.793                                                         | 204.639                                     | 4.387                                                           | 30.942                                      | 16.103                                          | 62.839                                      |
| 0.02            | 114.769                                                         | 187.980                                     | 7.987                                                           | 41.039                                      | 14.479                                          | 52.348                                      |
| 0.00            | 19.677                                                          | 208.898                                     | 1.554                                                           | 5.449                                       | 9.682                                           | 16.498                                      |
